# Supplementary material for: Forward and robust selection of the most potent and noncellular toxic siRNAs from RNAi libraries
Source: PubMed Central journal article supplement — Nucleic Acids Res. 2008 Nov 29;37(1):e8. doi: 10.1093/nar/gkn953 (PMC2615601; doi:10.1093/nar/gkn953), 2008-11-29
Supplement: gkn953_1.pdf [file gkn953_1.pdf]

**Supplementary Table 1**

**siMVP sequences inconsistently observed in surviving cells from each drug selection cycle**

| Selection cycle                      | siMVP Sequence                               |
|--------------------------------------|----------------------------------------------|
| 1st                                  | 5'-GUGUCCCGUGUGGAGGUCGGGCC-3'                |
|                                      | 5'-CCCCCAGUCACUACUGCACAGUGG-3'               |
|                                      | 5'-UGUGUCUCGGGAUGCCCAGGGCUUGGUGCUGUUUGAUG-3' |
|                                      | 5'-GGCUGGCCAGGACCCUUCSCCC-3'                 |
|                                      | 5'-CCCGGAAGGAAGUGGAGGUCGUGGA-3'              |
|                                      | 5'-CCACAGUAGGGGCGUACCUCCAGC-3'               |
|                                      | 5'-CCCAGCGGUGUUUG-3'                         |
|                                      | 5'-GUCCCGCCGCACUGGGGA-3'                     |
|                                      | 5'-CAGGACACAGAGGCCACGUGCCAGAUGUCCACGAG-3'    |
|                                      | 5'-GCCCCACAACUACUGCGUGAUU-3'                 |
|                                      | 5'-CACAGUAGGGGCGUACCUCCAG-3'                 |
|                                      | 5'-GGGCAUCUAUGUGCAGGAUGUCA-3'                |
|                                      | 5'-GCGUGAUUCUCGACCC-3'                       |
|                                      | 5'-GUCCCGCCGCACUGGGGAGGAGUGGC-3'             |
|                                      | 5'-GCAAGAAUCAGCUGGGGCAGAAGCGCGUGGUCAAGGG-3'  |
|                                      | 5'-UCAAGGGAGAGAAGUCUUUUUU-3'                 |
|                                      | 5'-GCUGUCGGAGCAGCAGGGGCUGCUGCUGAGG-3'        |
|                                      | 5'-CCUGGAGGAGGGGGAGGAUGAGGA-3'               |
|                                      | 5'-CCUGGAGUAUGUGCCAUCUGCCAAAGUG-3'           |
|                                      | 5'-CGAGAACGAGGGCAUCUAUGUGC-3'                |
| 5'-AGGGCAUCUAUGUGCAGGAUGUCA-3'       |                                              |
| 5'-UGAACAAGGGGCAGGAC-3'              |                                              |
| 5'-GGUGAGAAGGACACAGCUAAGAGCCUCCAG-3' |                                              |
| 2nd                                  | 5'-GAGGGCCUGCAGCCCUGGAGGAG-3'                |
|                                      | 5'-GAGCUGCCUCCGGGGUGGA-3'                    |
|                                      | 5'-GUCCCGCCGCACUGGGGA-3'                     |
|                                      | 5'-UCAAGACCGGAAAGGUGCGCGCUGU-3'              |
|                                      | 5'-CCUGCAGGUGGUUCUGC-3'                      |

- a. Only the sense strand is shown.
- b. Except the sequences listed in Table 1, no additional siMVP sequences were observed in the third drug selection cycle.
