# Supplementary material for: Forward and robust selection of the most potent and noncellular toxic siRNAs from RNAi libraries
Source: PubMed Central journal article supplement — Nucleic Acids Res. 2008 Nov 29;37(1):e8. doi: 10.1093/nar/gkn953 (PMC2615601; doi:10.1093/nar/gkn953), 2008-11-29
Supplement: gkn953_2.pdf [file gkn953_2.pdf]

**Supplementary Table 2****SiEGFP sequences inconsistently observed in surviving cells from each drug selection cycle**

| <b>Selection Cycle</b> | <b>siEGFP Sequence</b>                                                                                                                                                                                                                   |
|------------------------|------------------------------------------------------------------------------------------------------------------------------------------------------------------------------------------------------------------------------------------|
| <b>1st</b>             | 5'-CACCUACGGCAAGCUGACCCUGA-3'<br>5'-AGCACGACUUCUUCAAGUCCGCCAUGCCC-3'<br>5'-GACCACUACCAGCAGAACACCCCC-3'<br>5'-CCCCCAUCGGCGACGGCCCCGUGCUG-3'<br>5'-CCCCCAUCGGCGACGGCCCCGUGCUG-3'<br>5'-GCCCCGUGCUGCUGC-3'<br>5'-CCUGAGCACCCAGUCCGCCUGAGC3' |
| <b>2nd</b>             | 5'-GCUGGACGGCGACGUAAACGGCCACA-3'<br>5'-GCUGACCCUGAAGUUC-3'<br>5'-CUGGUGAACCGCAUCGAGCUGAAGGG-3'<br>5'-CCACAACAUCGAGGACGGCAGCGUGCA-3'<br>5'-GCCCCGUGCUGCUGC-3'                                                                             |
| <b>3rd</b>             | 5'-CCGCGCCGAGGUGAAGUUCGAGGGC-3'<br>5'-ACAUCCUGGGGCACAAGC-3'                                                                                                                                                                              |

Only the sense strand is shown.
