# Supplementary material for: Forward and robust selection of the most potent and noncellular toxic siRNAs from RNAi libraries
Source: PubMed Central journal article supplement — Nucleic Acids Res. 2008 Nov 29;37(1):e8. doi: 10.1093/nar/gkn953 (PMC2615601; doi:10.1093/nar/gkn953), 2008-11-29
Supplement: gkn953_3.pdf [file gkn953_3.pdf]

## Supplementary Figure 1

M16-1 siRNA exerts its potency in inhibiting MVP expression via the Ago-2 mediated RNAi pathway

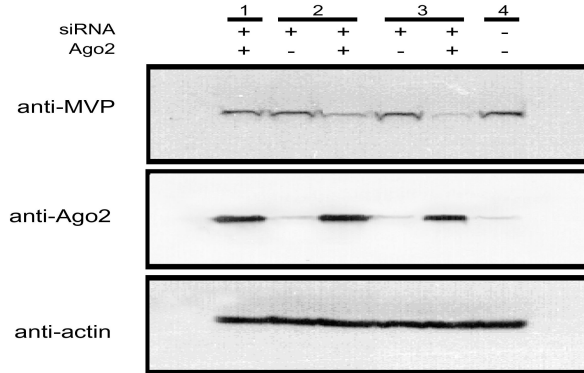

The synthetic M16-1 siRNA was co-transfected with vector expressing Ago-2 into U87-MG cells. After 48 hrs of transfection, cell lysates were subjected to Western blot analysis with anti-MVP, anti-Ago-2 and anti-actin antibodies, respectively. Lane 1, transfected with an irrelevant siRNA (si-EGFP) at a concentration of 5.0 nM; lane 2, transfected with M16-1 siRNA (1.0 nM); lane 3, transfected with M16-1 siRNA (5 nM); lane 4, control cells with no transfection of siRNA. The transfection of Ago-2 in cells was indicated.
