# Supplementary material for: Forward and robust selection of the most potent and noncellular toxic siRNAs from RNAi libraries
Source: PubMed Central journal article supplement — Nucleic Acids Res. 2008 Nov 29;37(1):e8. doi: 10.1093/nar/gkn953 (PMC2615601; doi:10.1093/nar/gkn953), 2008-11-29
Supplement: gkn953_4.pdf [file gkn953_4.pdf]

### Supplementary Figure 2

Toxicity of siMVPs isolated from the cells survived in the different concentrations of 5FC

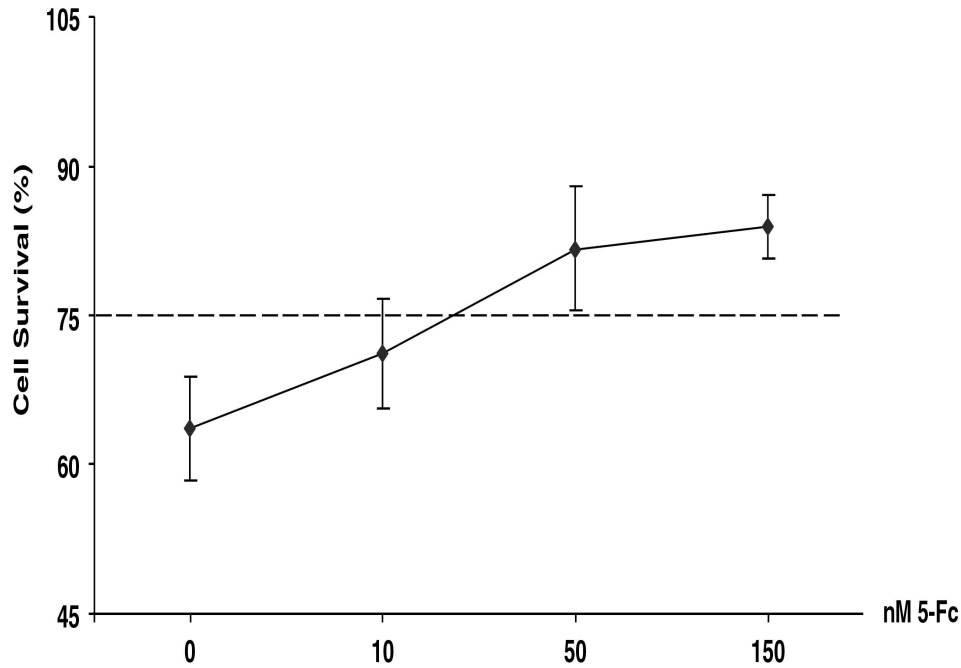

siMVP-containing plasmid DNAs were extracted from the surviving cells at the different concentrations of 5FC and transformed into *E. coli* DH5 $\alpha$  after the first drug selection cycle. For toxicity evaluation, 30 colonies were randomly selected from each transformation for re-isolation of siMVP-containing plasmids. HeLa cells in 96-well plate were transfected in triplicate with siMVP-containing plasmids (0.2 $\mu$ g) prepared from individual colonies. The values in the figure are the average of 30 transfections. The dotted line represents the 75% cell viability threshold. Data are mean  $\pm$  s.d.
